# Supplementary material for: Epigenetic and genetic features of 24 colon cancer cell lines
Source: PubMed Central journal article supplement — Oncogenesis. 2013 Sep 16;2(9):e71–. doi: 10.1038/oncsis.2013.35 (PMC3816225; doi:10.1038/oncsis.2013.35), 2013-09-16
Supplement: oncsis201335x1.pdf [file oncsis201335x1.pdf]

| Cell line                                                            | <i>KRAS</i><br><i>BRAF</i> | <i>PIK3CA</i><br><i>PTEN</i> | <i>TP53</i> | MSI | CIMP |
|----------------------------------------------------------------------|----------------------------|------------------------------|-------------|-----|------|
| DLD-1<br>HCT-15<br>TC71<br>HT-29<br>WiDr<br>FRI<br>NCI-H508<br>SW948 | mutated gene               |                              |             | MSI | CIMP |
| CO-115<br>HCT-116<br>RKO<br>LS-174T<br>EB                            |                            |                              |             | MSI | CIMP |
| IS1<br>IS3<br>LS1034<br>SW1116<br>SW480<br>SW620                     | mutated gene               |                              |             |     |      |
| LoVo                                                                 | mutated gene               |                              |             | MSI |      |
| CaCo-2<br>COLO 320<br>V9P                                            | mutated gene               |                              |             |     |      |
| SW48                                                                 |                            |                              |             | MSI | CIMP |

mutated gene    
 MSI / CIMP+

**Supplementary Figure 1. Epigenetic and genetic features of colon cancer cell lines.** Cell lines are sorted and colored according to mutations in the *BRAF/KRAS*, *PIK3CA/PTEN* and *TP53* cancer genes. CIMP phenotypes are according to the Weisenberger et al. panel.
